# Supplementary material for: Synthesis, characterization, antibacterial activity and cytotoxicity of hollow TiO2-coated CeO2nanocontainers encapsulating silver nanoparticles for controlled silver release
Source: Royal Society of Chemistry journal article supplement (doi:10.1039/c5tb01917f), 2016-01-01
Supplement: c5tb01917f1.pdf [file c5tb01917f1.pdf]

## Electronic Supplementary Information

Synthesis, characterization, antibacterial activity and cytotoxicity of hollow TiO<sub>2</sub>-coated CeO<sub>2</sub> nanocontainers encapsulating silver nanoparticles for controlled silver release

*J. Gagnon,<sup>\*a,c</sup> M. J. D. Clift,<sup>b</sup> D. Vanhecke,<sup>b</sup> I. E. Widner<sup>c</sup>, S.-L. Abram,<sup>a</sup> A. Petri-Fink,<sup>b</sup>  
R. A. Caruso,<sup>c</sup> B. Rothen-Rutishauser,<sup>b</sup> and K. M. Fromm<sup>\*a</sup>*

<sup>a</sup> Department of Chemistry and Fribourg Center for Nanomaterials, University of Fribourg, Chemin du Musée 9, 1700 Fribourg, Switzerland. Email: [katharina.fromm@unifr.ch](mailto:katharina.fromm@unifr.ch), [jacinte.gagnon@iaf.inrs.ca](mailto:jacinte.gagnon@iaf.inrs.ca)

<sup>b</sup> Adolphe Merkle Institute, University of Fribourg, Chemin de Verdiers 4, 1700 Fribourg, Switzerland.

<sup>c</sup> PFPC, School of Chemistry, The University of Melbourne, Melbourne, Victoria 3010, Australia.

## Effects of sonication and ammonia-containing surfactant on AgNP/CeO<sub>2</sub>/TiO<sub>2</sub> nanocontainers

In order to test the effects of sonication and surfactant on the nanocontainer integrity, three samples were prepared in the same way as usual, except that one sample did not contain any surfactant, one contained the non-ionic surfactant solution and the other contained the ammonia-containing surfactant solution. None of them contained titanium butoxide. Figure S1 shows the morphology of the nanocontainers after these treatments. The same nanocontainer disintegration and coalescence effects were observed in each sample, regardless of the surfactant. This demonstrates that sonication is responsible for the change of shape and the disintegration of the CeO<sub>2</sub> nanocontainers. However, the fact that this effect is considerably more common in these tests without titanium butoxide than during the TiO<sub>2</sub> coating synthesis suggests that TiO<sub>2</sub> coatings can protect the nanocontainers against disintegration.

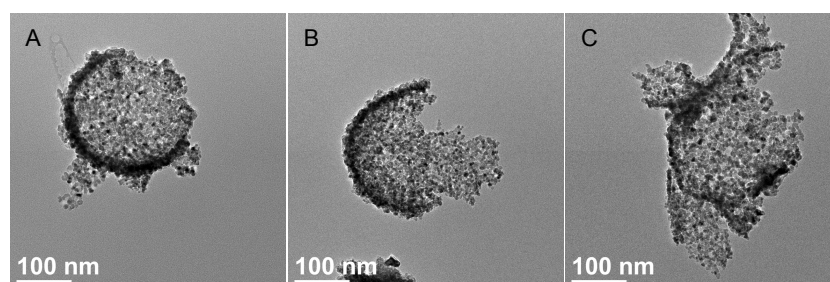

Figure S1: TEM images of CeO<sub>2</sub> nanocontainers after being sonicated for one hour in ethanol in the absence of any surfactant (A), in the presence of non-ionic surfactant (B) and in the presence of ammonia-containing non-ionic surfactant (C).

In order to test the effect of ammonia-containing surfactant solution, a surfactant solution without ammonia was prepared and used for coating CeO<sub>2</sub> nanocontainers with TiO<sub>2</sub>. Since the ammonia would increase the electrostatic repulsion between particles, this would be expected to yield thinner coatings. In the absence of ammonia, the coating should therefore be thicker. This effect was in fact observed during TEM characterization (Figure S2). The

TiO<sub>2</sub> coating was so thick that the structure of the CeO<sub>2</sub> shell could hardly be observed. In some particles, electron-dense nanoparticles, probably corresponding to the AgNPs, are observed within or on the surface of the TiO<sub>2</sub> coating. This confirms that the ammonia is essential to ensure a thinner TiO<sub>2</sub> coating.

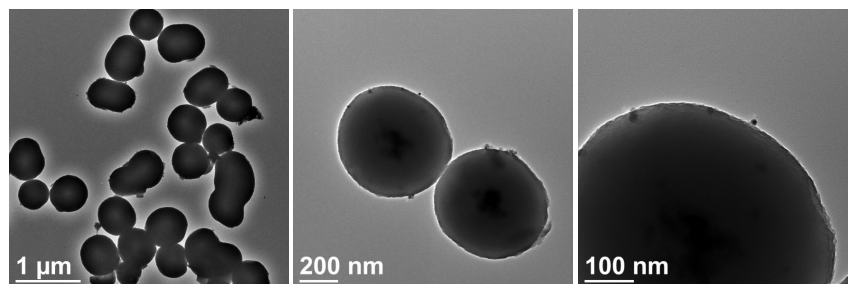

Figure S2: TEM images of AgNP/CeO<sub>2</sub>/TiO<sub>2</sub> nanocontainers prepared with non-ionic surfactant solution without ammonia before calcination.

### EDS spectrum of AgNP/CeO<sub>2</sub>/TiO<sub>2</sub> nanocontainers

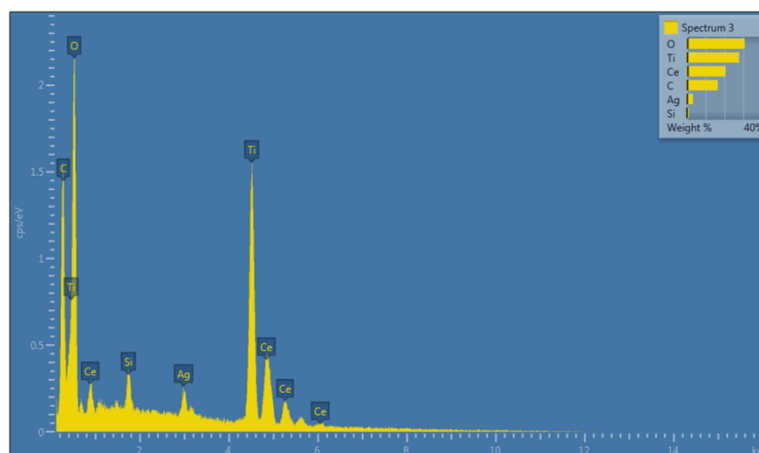

Figure S3: EDS of AgNP/CeO<sub>2</sub>/TiO<sub>2</sub> nanocontainers before calcination. The carbon content originates from the carbon tape.
